# Supplementary material
Source: PubMed Central journal article supplement (PMC6866013)
Supplement: MCN-13-e12336-s001.pdf [file MCN-13-e12336-s001.pdf]

## Appendix I: Critical appraisal tool

| Questions:                                                                    | Yes | No | Unsure | N/A | Comments |
|-------------------------------------------------------------------------------|-----|----|--------|-----|----------|
| <b>Did the study address a clearly focused issue?</b>                         |     |    |        |     |          |
| <b>Did the authors use an appropriate method to answer their question?</b>    |     |    |        |     |          |
| - Did it address the study question?                                          |     |    |        |     |          |
| <b>Were the subjects recruited in an acceptable way?</b>                      |     |    |        |     |          |
| - Selection bias?                                                             |     |    |        |     |          |
| - Is the sample representative?                                               |     |    |        |     |          |
| <b>Was the study population clearly specified and defined?</b>                |     |    |        |     |          |
| <b>Were the measures accurately measured to reduce bias?</b>                  |     |    |        |     |          |
| - Measurement or classification bias?                                         |     |    |        |     |          |
| - Did they use subjective or objective measurements?                          |     |    |        |     |          |
| - Do the measures truly reflect what you want them to?                        |     |    |        |     |          |
| <b>Were the data collected in a way that addressed the research issue?</b>    |     |    |        |     |          |
| - Is the setting for data collection justified?                               |     |    |        |     |          |
| - Is it clear how data were collected?                                        |     |    |        |     |          |
| - Are the methods chosen justified?                                           |     |    |        |     |          |
| - Are the methods made explicit?                                              |     |    |        |     |          |
| <b>Did the study have enough participants to minimise the play of chance?</b> |     |    |        |     |          |
| - Is the result precise enough to make a decision?                            |     |    |        |     |          |
| - Is there a power calculation?                                               |     |    |        |     |          |
| - Is the number justified?                                                    |     |    |        |     |          |
| <b>How are the results presented and what is the main result?</b>             |     |    |        |     |          |
| - Are they presented clearly i.e. as a measurement?                           |     |    |        |     |          |
| - Is the result meaningful?                                                   |     |    |        |     |          |
| <b>Was the data analysis sufficiently rigorous?</b>                           |     |    |        |     |          |
| <b>Is there a clear statement of findings?</b>                                |     |    |        |     |          |
| - Are findings explicit?                                                      |     |    |        |     |          |
| - Is there adequate discussion of the evidence?                               |     |    |        |     |          |
| - Is credibility of findings discussed?                                       |     |    |        |     |          |
| - Are findings discussed related to original research questions?              |     |    |        |     |          |
| <b>Are the results generalisable?</b>                                         |     |    |        |     |          |

## Appendix 2: List of articles unavailable through inter-library loans/translator not available

- 1) MAHAKA HT and CHAKOMBERA E, 2008. Knowledge, attitudes and practices on infant feeding options among HIV positive mothers. Central African Journal of Medicine, 54(9-12), pp. 51-53.
- 2) AGU, U. and AGU, M., 2011. Knowledge and practice of exclusive breastfeeding among mothers in a rural population in south eastern Nigeria. Tropical Journal of Medical Research, 15(2), pp. 39-44.
- 3) WREN, H. and CHAMBERS, L., 2011. Breastfeeding in Cambodia: mother knowledge, attitudes and practices. World health & population, 13(1), pp. 17-29.

- 4) SINGH, D., VERMA, M., KATOCH, V. and SINGH, T., 1993. Impact of health education pamphlets on maternal knowledge. Indian Journal of Maternal and Child Health, 4(4), pp. 105-107.
- 5) ALI, I., RABBANI, M, W., SHEIKH, M, A., 2010. Patterns of feeding in children under eighteen month of age in Multan; a hospital based study – Children Hospital and Institute of Child Health-Department of pediatrics. Index Medicus for the Eastern Mediterranean Region – IMEMR. Medical Forum Monthly 2010; 21 (12): 37-40
- 6) Croatian article excluded due to no translator: MUJKIĆ, A. and VULETIĆ, G., 2004. Knowledge and attitudes towards breastfeeding among nursing women. Acta Medica Croatica, 58, pp. 37-41.
